# Supplementary material for: A Promising Physical Pest-Control System Demonstrated in a Greenhouse Equipped with Simple Electrostatic Devices that Excluded all Insect Pests
Source: Preprints.org preprint supplement (doi:10.20944/preprints201905.0256.v1), 2019-05-21
Supplement: Supplementary file 1 [file supplementary]

| <b>Supplementary table 1.</b> Capture of insect pests blown toward the insulated conductor wires by double- and single-charged dipolar electric field screens |                                                     |     |     |                     |
|---------------------------------------------------------------------------------------------------------------------------------------------------------------|-----------------------------------------------------|-----|-----|---------------------|
| Insect pests tested                                                                                                                                           | Voltage required to completely capture insects (kV) |     |     |                     |
|                                                                                                                                                               | Double-charged type                                 |     |     | Single-charged type |
|                                                                                                                                                               | 1                                                   | 2   | 3   | 5 <sup>a</sup>      |
| Whiteflies                                                                                                                                                    | 0.8                                                 | 1.0 | 1.2 | 2.7                 |
| Green peach aphids                                                                                                                                            | 1.0                                                 | 1.0 | 1.2 | 3.2                 |
| Western flower thrips                                                                                                                                         | 1.5                                                 | 2.0 | 2.0 | 4.2                 |
| Tomato leaf-minor flies                                                                                                                                       | 1.2                                                 | 1.5 | 1.5 | 4.2                 |
| <sup>a</sup> Wind velocity of blowing (m/sec)                                                                                                                 |                                                     |     |     |                     |

**Supplementary table 2.** Insects avoiding a dipolar electric field

| Order        | Family          | Genus and species                    | Common name                         | Voltage (kV) of avoidance |
|--------------|-----------------|--------------------------------------|-------------------------------------|---------------------------|
| Coleoptera   | Anobiidae       | <i>Lasioderma serricorne</i>         | Cigarette beetle                    | 0.8                       |
|              | Attelabidae     | <i>Euops splendidus</i>              | Leaf-rolling weevil                 | 1.8                       |
|              | Bruchidae       | <i>Callosobruchus chinensis</i>      | Azuki bean weevil                   | 1.2                       |
|              | Cerambycidae    | <i>Chlorophorus annularis</i>        | Bamboo longicorn beetle             | 2.8                       |
|              |                 | <i>Phytoecia rufiventris</i>         | Chrysanthemum longicorn beetle      | 1.9                       |
|              |                 | <i>Argopistes coccinelliformis</i>   | Ladybug mimicking leaf beetle       | 3.2                       |
|              | Chrysomelidae   | <i>Aulacophora femoralis</i>         | Cucurbit leaf beetle                | 1.3                       |
|              |                 | <i>Chrysolina aurichalcea</i>        | Mugwort leaf beetle                 | 1.9                       |
|              |                 | <i>Gallerucida bifasciata</i>        | Dioscorea leaf beetle               | 2.8                       |
|              |                 | <i>Gastrophysa atrocyanea</i>        | Japanese green duck leaf beetle     | 1.2                       |
|              |                 | <i>Gonioctena rubripennis</i>        | Wisteria leaf beetle                | 2.8                       |
|              |                 | <i>Lema cirsicola</i>                | Leaf beetle                         | 2.8                       |
|              |                 | <i>Ophraella communa</i>             | Ragweed leaf beetle                 | 1.2                       |
|              |                 | <i>Coccinella septempunctata</i>     | Seven-spotted ladybird beetle       | 2.4                       |
|              |                 | <i>Aiolocaria hexaspilota</i>        | Ladybird beetle                     | 1.2                       |
|              |                 | <i>Epilachna vigintioctopunctata</i> | Twentyeight-spotted ladybird beetle | 2.4                       |
|              |                 | <i>Harmonia axyridis</i>             | Asian ladybird beetle               | 2.1                       |
|              |                 | <i>Anosimus decoratus</i>            | Weevil                              | 2.5                       |
|              | Curculionidae   | <i>Episomus turritus</i>             | Weevil                              | 4.3                       |
|              |                 | <i>Eugnathus distinctus</i>          | Weevil                              | 3.2                       |
|              |                 | <i>Nesalcidodes trifidus</i>         | Snout weevil                        | 4.3                       |
|              | Elateridae      | <i>Pectocera fortunei</i>            | Click beetle                        | 2.1                       |
|              | Meloidae        | <i>Epicauta gorhami</i>              | Blister beetle                      | 0.4                       |
|              | Mordellidae     | <i>Mordella brachyura</i>            | Tumbling flower beetle              | 3.2                       |
|              | Oedemeridae     | <i>Xanthochroa atriceps</i>          | False blister beetle                | 4.5                       |
|              | Rhynchophoridae | <i>Sitophilus oryzae</i>             | Rice weevil                         | 4.5                       |
|              |                 | <i>Plesiophthalmus nigrocyaneus</i>  | Mimawari beetle                     | 4.5                       |
|              |                 | <i>Tribolium castaneum</i>           | Red flour beetle                    | 2.4                       |
|              | Tenebrionidae   | <i>Uloa latimanus</i>                | Black fungus beetle                 | 0.5                       |
| Hemiptera    | Aleyrodidae     | <i>Bemisia tabaci</i>                | Sweet potato whitefly               | 0.9                       |
|              | Aphididae       | <i>Myzus persicae</i>                | Green peach aphid                   | 1.5                       |
|              | Cicadellidae    | <i>Nephotettix cincticeps</i>        | Green rice leafhopper               | 0.3                       |
|              | Tettigellidae   | <i>Bothrogonia ferruginea</i>        | Black tipped leafhopper             | 0.5                       |
|              | Lygaeidae       | <i>Geocoris varius</i>               | Large white-spotted seed bug        | 1.2                       |
|              |                 | <i>Metochus abbreviatus</i>          | Large white-spotted seed bug        | 0.8                       |
|              | Pentatomidae    | <i>Eurydema rugosa</i>               | Cabbage bug                         | 1.1                       |
|              | Agromyzidae     | <i>Liriomyza sativae</i>             | Tomato leaf-minor                   | 1.2                       |
| Diptera      | Bibionidae      | <i>Bibio japonicus</i>               | Love bug                            | 0.8                       |
|              | Culicidae       | <i>Aedes albopictus</i>              | Asian tiger mosquito                | 0.5                       |
|              | Drosophilidae   | <i>Drosophila melanogaster</i>       | Vinegar fly                         | 1.7                       |
|              | Ephydriidae     | <i>Scatella stagnalis</i>            | Greenhouse shore fly                | 1.7                       |
|              | Psychodidae     | <i>Clogmia albipunctatus</i>         | Bath room fly                       | 1.7                       |
|              | Anthophoridae   | <i>Tetralonia nipponensis</i>        | Long-horned bee                     | 1.6                       |
|              | Chalcididae     | <i>Brachymeria lasus</i>             | Chalcid wasp                        | 0.9                       |
|              | Formicidae      | <i>Formica japonica</i>              | Japanese wood ant                   | 0.2                       |
| Lepidoptera  | Sphecidae       | <i>Sphex argentatus</i>              | Digger wasps                        | 4.2                       |
|              | Geometridae     | <i>Biston robustus</i>               | Lilac beauty                        | 1.4                       |
|              | Tineidae        | <i>Tineola bisselliella</i>          | Common clothes moth                 | 1.4                       |
| Blattodea    | Blattellidae    | <i>Blattella germanica</i>           | German cockroach                    | 1.8                       |
|              | Blattidae       | <i>Neostylopyga rhombifolia</i>      | Harlequin cockroach                 | 1.2                       |
| Thysanoptera | Thripidae       | <i>Frankliniella occidentalis</i>    | Western flower thrips               | 1.2                       |
| Mantodea     | Mantidae        | <i>Tenodera aridifolia</i>           | Praying mantis                      | 0.7                       |
| Psocoptera   | Liposcelidae    | <i>Liposcelis bostrychophilus</i>    | Book louse                          | 0.6                       |
| Dermaptera   | Anisolabididae  | <i>Dermaptera</i> sp.                | Earwig                              | 0.7                       |
| Orthoptera   | Tetragoidea     | <i>Acridium japonicum</i>            | Bolivar                             | 1.1                       |
| Isopoda      | Armadillidiidae | <i>Armadillidium vulgare</i>         | Pill bug                            | 1.6                       |
|              | Rhinotermitidae | <i>Coptotermes formosanus</i>        | Oriental termite                    | 1.6                       |
| Araneae      | Araneus         | <i>Araneus ventricosus</i>           | Orb-weaving spider                  | 2.2                       |
|              | Pardosa         | <i>Pardosa astrigera</i>             | Wolf spider                         | 2.1                       |
|              | Pisauridae      | <i>Dolomedes sulfureus</i>           | Fishing spider                      | 2.3                       |
|              | Thomisidae      | <i>Thomisus labefactus</i>           | Crab spider                         | 2.8                       |
|              | Uloboridae      | <i>Octonoba varians</i>              | Zebra spider                        | 2.3                       |

**Supplementary table 3.** Exclusion of insect pests from a greenhouse furnished with single-charged dipolar electric field screens

| Test insect pests       | Installment of single-charged dipolar electric field screens | Number of pests entering the rooms |      |      |      |      |                |
|-------------------------|--------------------------------------------------------------|------------------------------------|------|------|------|------|----------------|
|                         |                                                              | 1                                  | 2    | 3    | 4    | 5    | 6 <sup>a</sup> |
| Whiteflies              | yes                                                          | 0                                  | 0    | 0    | 0    | 0    | 0              |
|                         | no                                                           | 4285                               | 6583 | 7255 | 4001 | 5890 | 6661           |
| Green peach aphids      | yes                                                          | 0                                  | 0    | 0    | 0    | 0    | 0              |
|                         | no                                                           | 0                                  | 0    | 0    | 0    | 0    | 0              |
| Western flower thrips   | yes                                                          | 0                                  | 0    | 0    | 0    | 0    | 0              |
|                         | no                                                           | 0                                  | 0    | 0    | 0    | 0    | 0              |
| Tomato leaf-minor flies | yes                                                          | 0                                  | 0    | 0    | 0    | 0    | 0              |
|                         | no                                                           | 285                                | 583  | 255  | 401  | 589  | 361            |

a Number of experiment
