# Supplementary material for: A Promising Physical Pest-Control System Demonstrated in a Greenhouse Equipped with Simple Electrostatic Devices that Excluded all Insect Pests
Source: Preprints.org preprint supplement (doi:10.20944/preprints201905.0256.v1), 2019-05-21
Supplement: Supplementary file 2 [file supplementary]

Archive with 3 entries (3 files):
- Supplementary figures.pdf
- Supplementary tables.pdf
- Video supplement 1.mp4
