# Supplementary material for: A Promising Physical Pest-Control System Demonstrated in a Greenhouse Equipped with Simple Electrostatic Devices that Excluded all Insect Pests
Source: Preprints.org preprint supplement (doi:10.20944/preprints201905.0256.v1), 2019-05-21

**Supplementary figure 1.** Schematic representation of structure and function of negative (A) and positive (B) voltage generators in an electric driver part and earthed (C) and non-earthed circuit (D, E) integrated in single- and double-charged types of the electric field screen.

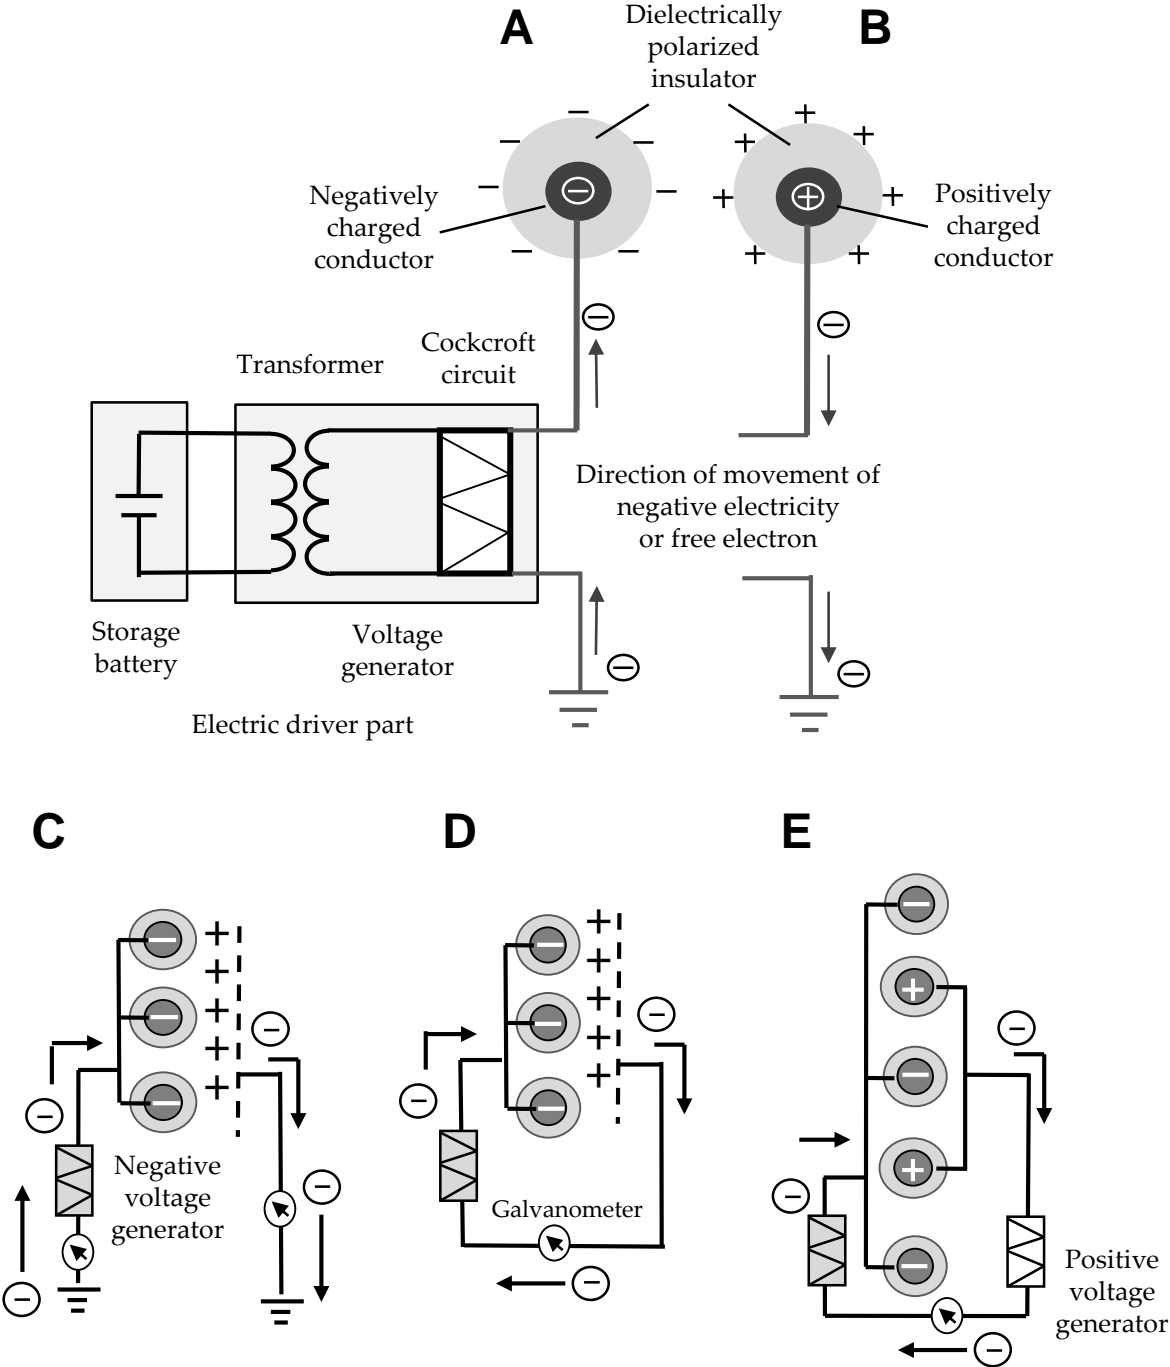

**Supplementary figure 2.** Schematic representation of the independent type of single-charged dipolar electric field screen consisting of three units (A) and practically applied marketable single-charged dipolar electric field screens to a greenhouse facility of Osaka Prefectural Research Institute of Environment, Agriculture and Fisheries (B) and an experimental greenhouse of Faculty of Agriculture, Kindai University (C)..

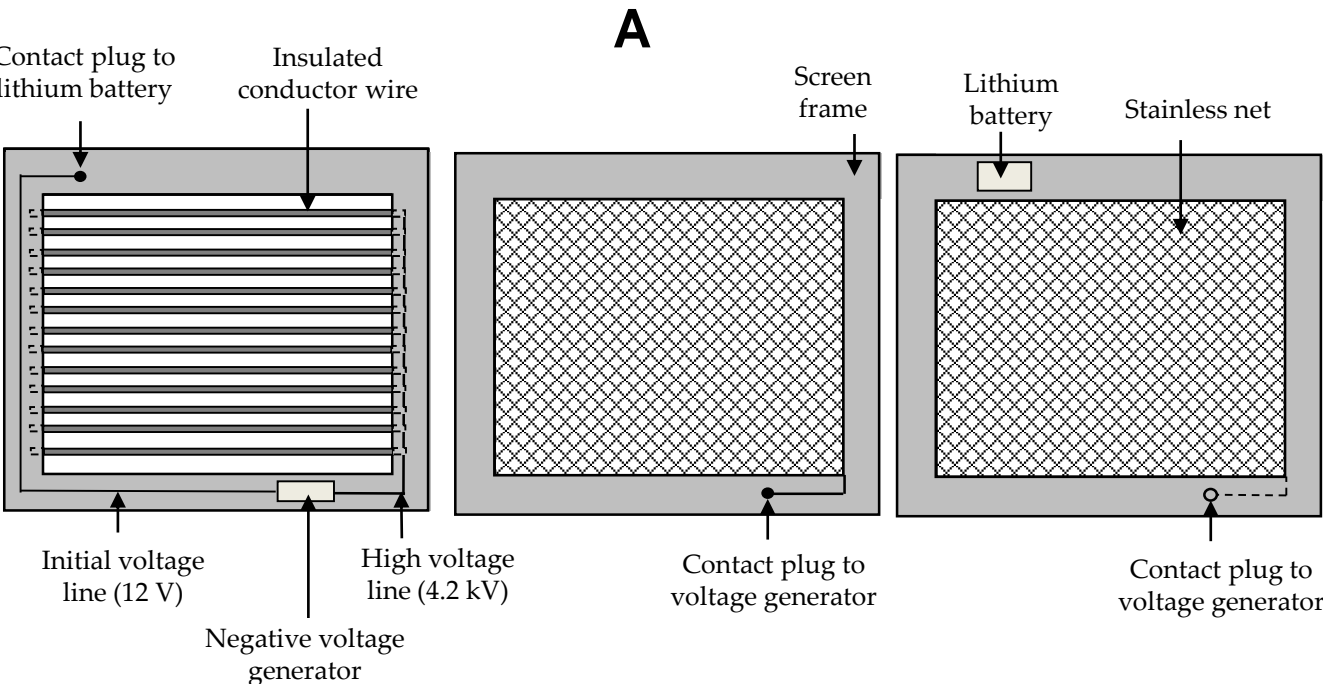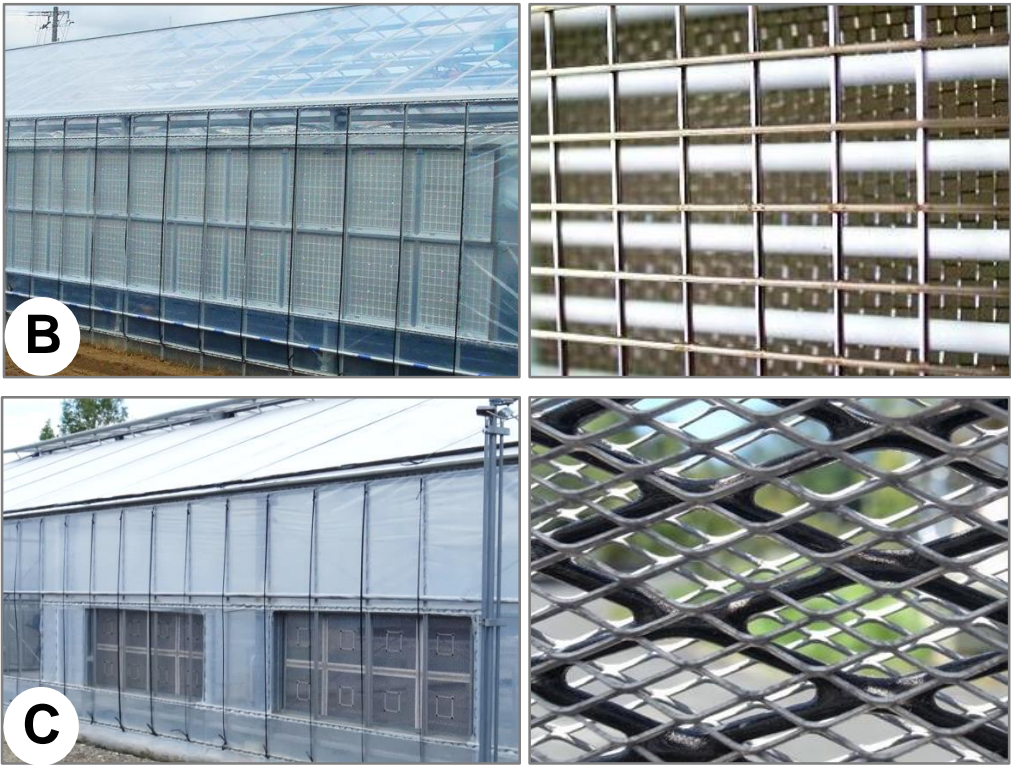

**Supplementary figure 3.** (A) Schematic representation of a structure of an electrostatic insect sweeper and (B) inner structure of the electrostatic insect sweeper and capture of insects on a plan leaf, and (C) photographic demonstration of electrostatic insect sweeper used for trapping insects resting on leaves of greenhouse tomatoes and (D) whiteflies trapped with insulated conductor wires of the electrostatic insect sweeper.

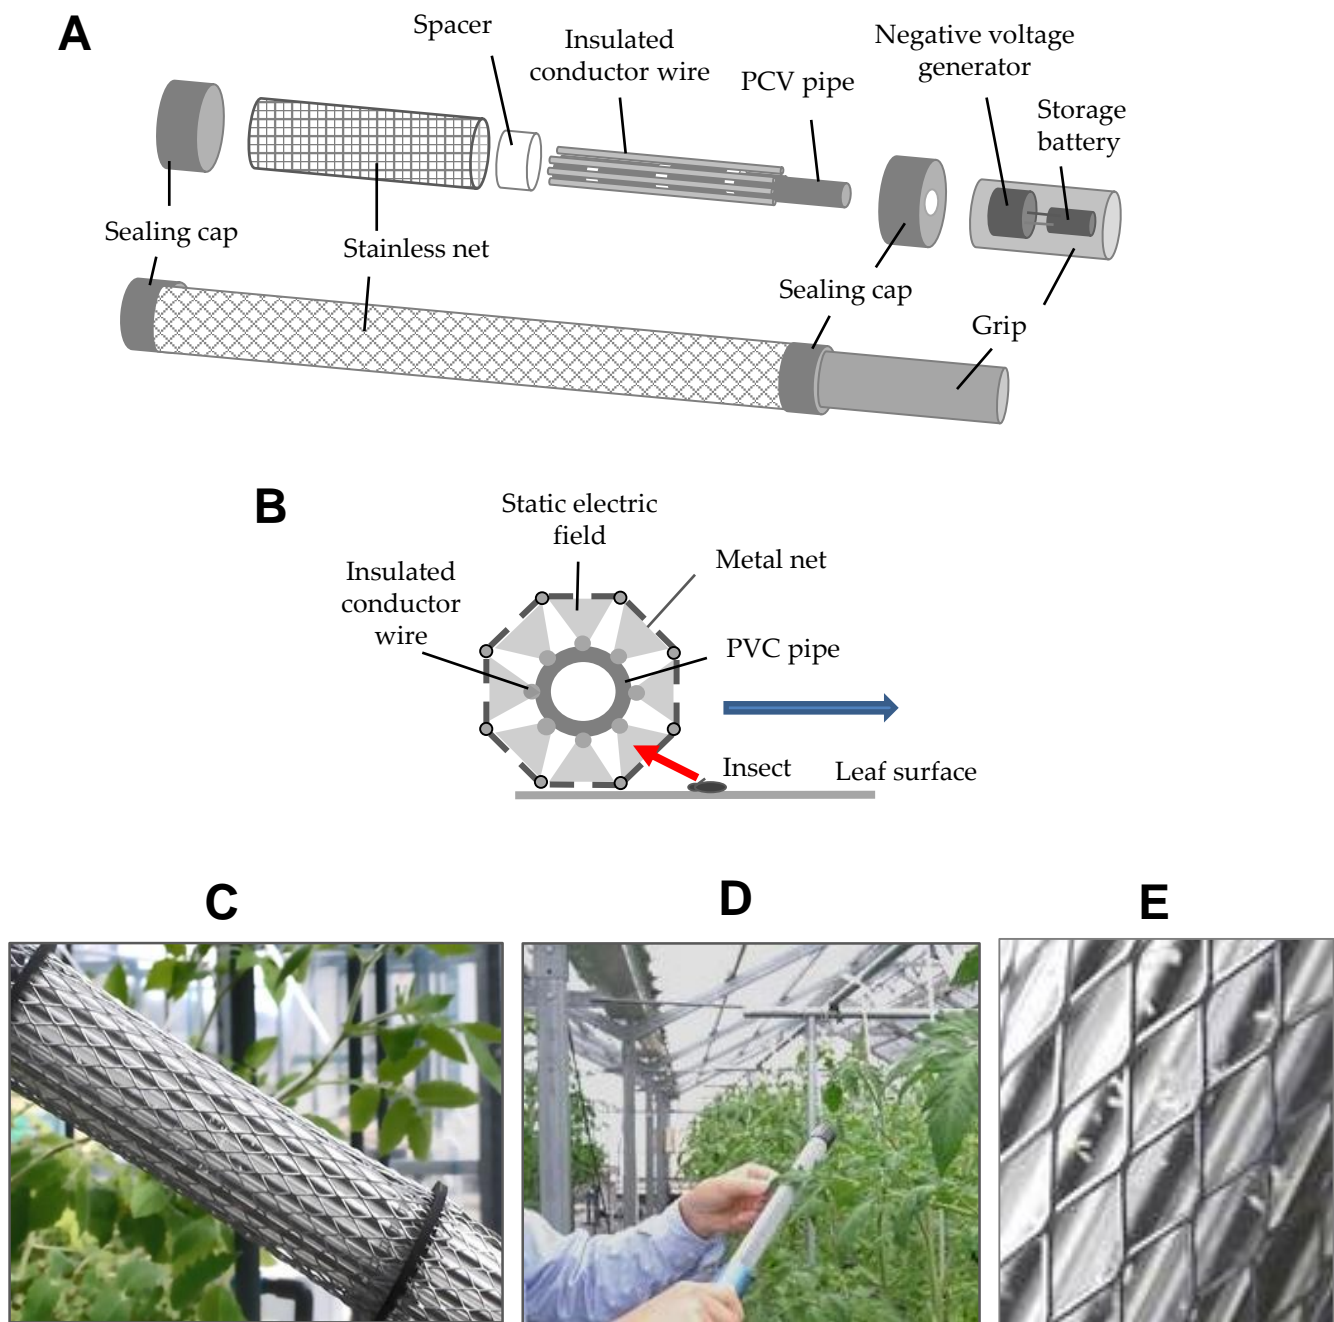

**Supplementary figure 4.** Photographic and schematic representation of an electrostatic flying insect catcher.

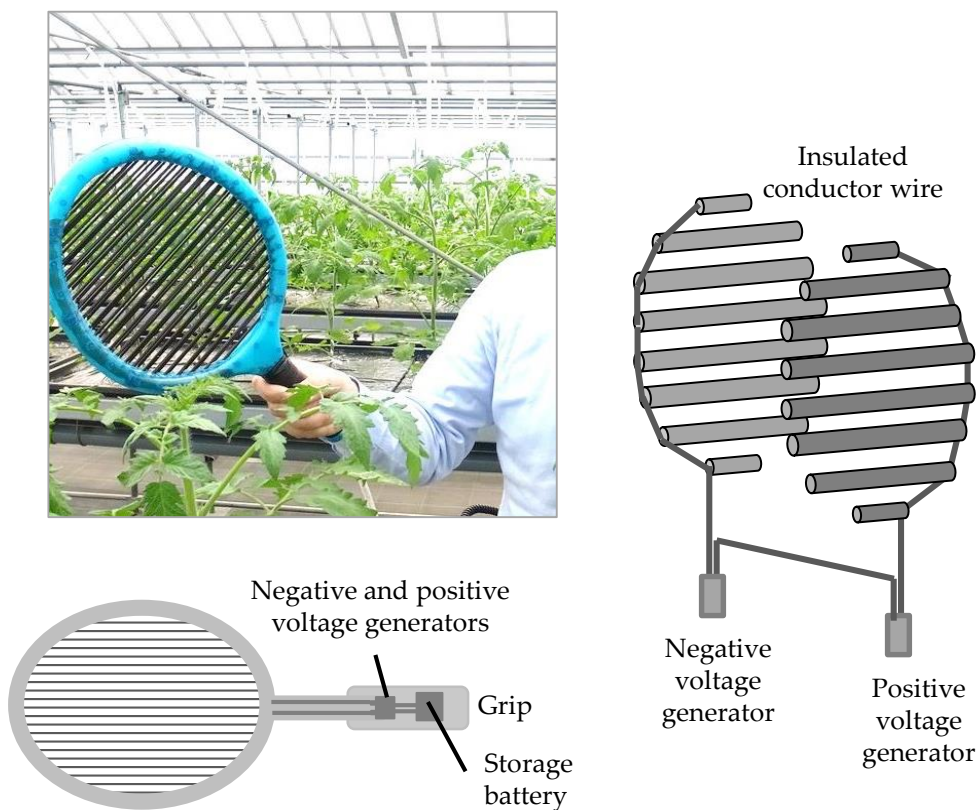

Supplement: Supplementary file 2 [file supplementary › Supplementary figures.pdf]
